# Supplementary material for: Tumor-associated macrophages/C-X-C motif chemokine ligand 1 promotes breast cancer autophagy-mediated chemoresistance via IGF1R/STAT3/HMGB1 signaling
Source: Springer Nature journal article supplement (doi:10.1038/s41419-024-07123-5), 2024-10-11
Supplement: MOESM1 [file 41419_2024_7123_MOESM1_ESM.pdf]

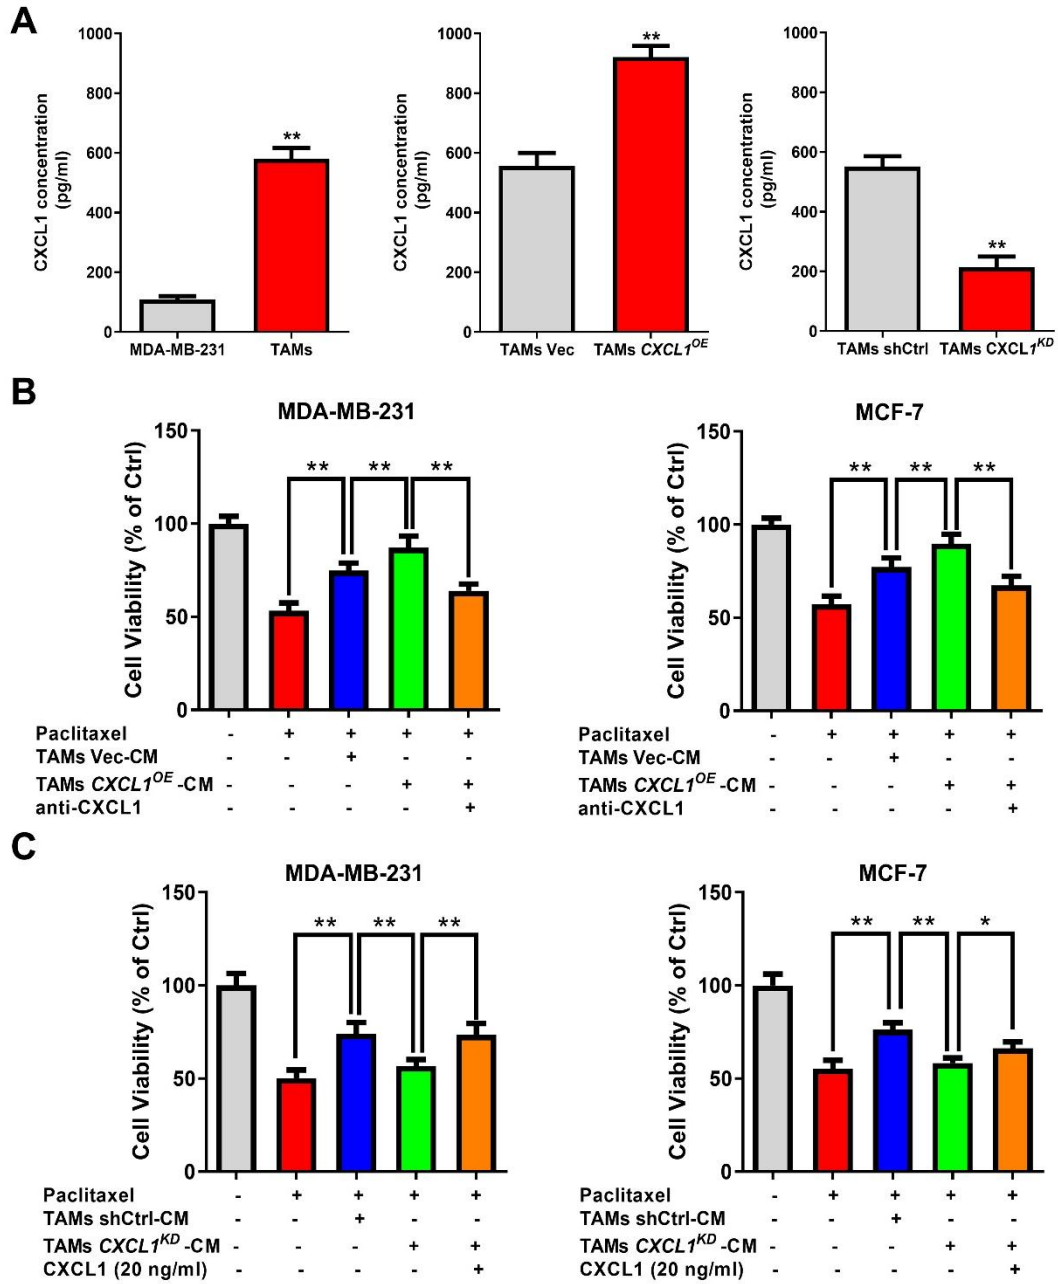

**Supplementary Fig 1. The concentration of CXCL1 in supernatants derived from TAMs and MDA-MB-231 cells.** (A) ELISA assays were utilized to detect the concentration of CXCL1 in supernatants derived from TAMs, MDA-MB-231 cells, TAMs Vec, TAMs *CXCL1*<sup>OE</sup>, TAMs shCtrl as well as TAMs *CXCL1*<sup>KD</sup>. Values are presented as Mean  $\pm$  SD,  $n = 3$ ,  $**P < 0.01$ . (B) CCK8 assays were conducted to assess the impact of CXCL1 overexpression on TAMs-induced paclitaxel resistance in breast cancer cells, as well as the reversal effect of a CXCL1 neutralizing antibody (Mean  $\pm$  SD,  $n = 6$ ,  $**P < 0.01$ ). (C) The inhibitory effects of CXCL1 knockdown on TAMs-induced paclitaxel resistance in breast cancer cells were also evaluated using CCK8 assays (Mean  $\pm$  SD,  $n = 6$ ,  $*P < 0.05$ ,  $**P < 0.01$ ).
